# Supplementary material for: Wheat Type One Protein Phosphatase Participates in the Brassinosteroid Control of Root Growth via Activation of BES1
Source: MDPI journal article supplement (doi:10.3390/ijms221910424), 2021-09-27
Supplement: s1 [file s1]

**a**

MS

Col-0    TdPP1-GFP L7    TdPP1-GFP L10    TdPP1-GFP L13    *bes1-D*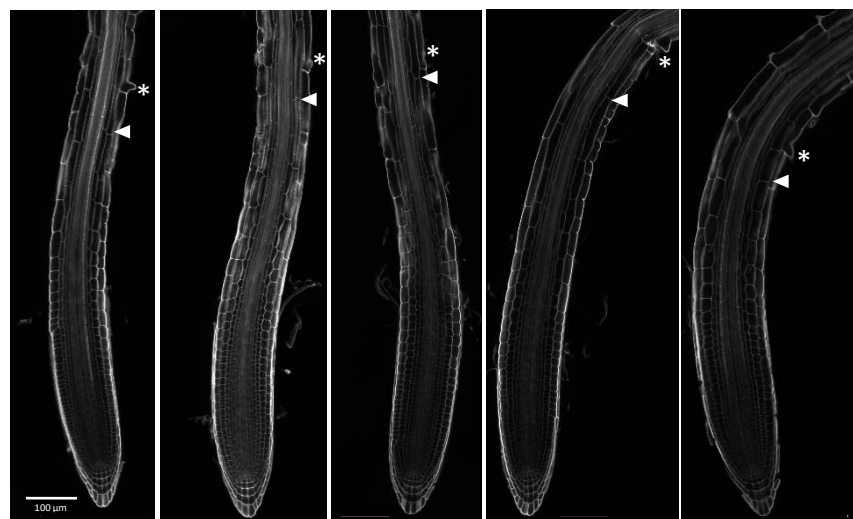**b**

MS + 0.4 nM eBL

Col-0    TdPP1-GFP L7    TdPP1-GFP L10    TdPP1-GFP L13    *bes1-D*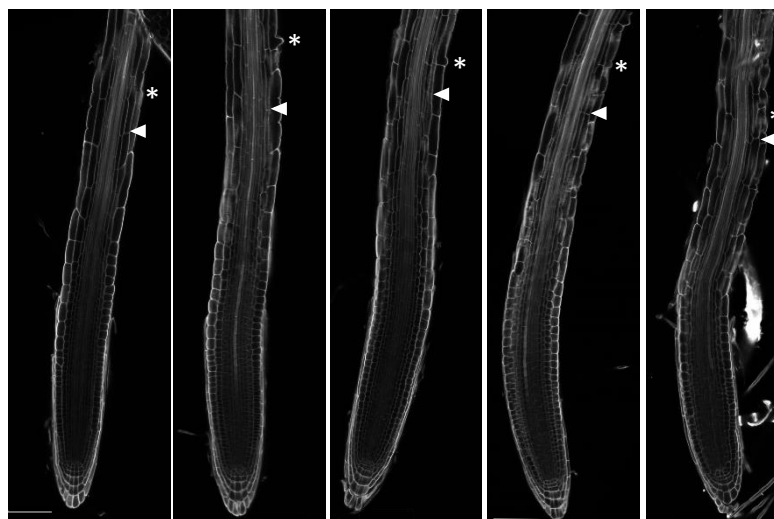**c**

MS + 1 nM eBL

Col-0    TdPP1-GFP L7    TdPP1-GFP L10    TdPP1-GFP L13    *bes1-D*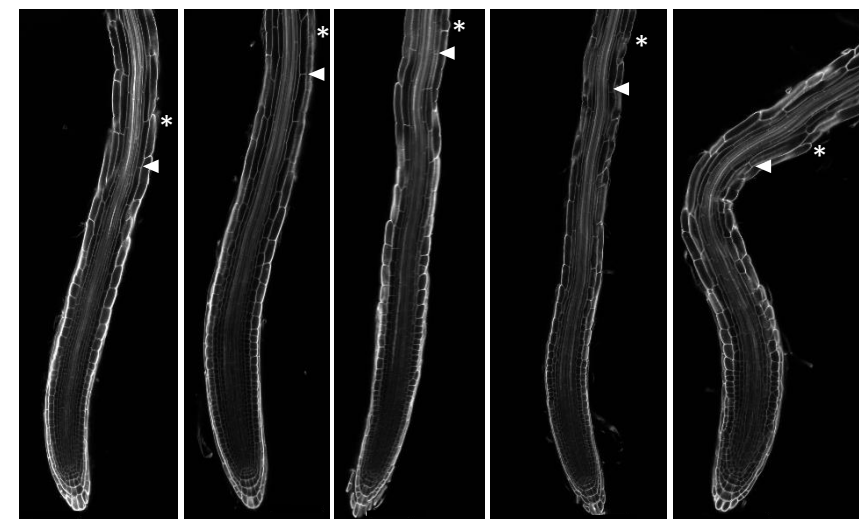

**Supplemental Table S1.** List of primers used in the present study.

| Description                                                  | Primer Name  | Primer Sequence (5'→3')         |
|--------------------------------------------------------------|--------------|---------------------------------|
| Real-time PCR primer for <i>TdPP1</i> ORF (KM203893)         | qRT TdPP1-Fw | 5'-ATGAATGCAAGCGTCGCTTC-3'      |
|                                                              | qRT TdPP1-Rv | 5'-ATCAATTAGAGCGGCCACAG-3'      |
| Real-time PCR primer for <i>DWF4</i> ( <i>At3g50660</i> )    | qRT DWF4-Fw  | 5'-TGGCAACAGCAAAACAACGG-3'      |
|                                                              | qRT DWF4-Rv  | 5'-ACGGCATGTAGTTGTTTCCC-3'      |
| Real-time PCR primer for <i>CPD</i> ( <i>At5g05690</i> )     | qRT CPD-Fw   | 5'-TGAAACAACCTCCACGATCATGA-3'   |
|                                                              | qRT CPD-Rv   | 5'- TGCCCTAATCTTTTCATGCTCTTC-3' |
| Real-time PCR primer for <i>Actin 2</i> ( <i>At3g18780</i> ) | qRT ACT2-Fw  | 5'-CAGTGTCTGGATCGGTGGTT-3'      |
|                                                              | qRT ACT2-Rv  | 5'-TGAACGATTCTTGACCTGC-3'       |
| Real-time PCR primer for <i>GAPC2</i> ( <i>At1g13440</i> )   | qRT GAPC2-Fw | 5'- TTTCCGTGTTCCAACCGTTG-3'     |
|                                                              | qRT GAPC2-Rv | 5'- AGATTCCTCCTTGATGGCCTTC-3'   |
